# Supplementary material
Source: ML conference proceedings conference paper supplement (https://openreview.net/forum?id=lgj33-O1Ely)
Supplement: supplementary_material [file attachment]

---

# Supplementary Material:

## TotalSelfScan: Learning Full-body Avatars from Self-Portrait Videos of Faces, Hands, and Bodies

---

Anonymous Author(s)

Affiliation

Address

email

1 In this supplementary material, we describe the implementation details and provide the detailed  
2 quantitative results of each person. Moreover, we provide a video to show the qualitative results of  
3 our method. The code and dataset will be released upon the publication of the paper.

### 4 1 Implementation details

5 **Network architecture and hyper-parameters.** For each part  $p$ , the signed distance field  $F_s^p$ ,  
6 color field  $F_c^p$ , and non-rigid displacement field  $T_{nr}^p$  are all represented as MLP networks whose  
7 dimension of hidden layers is 256. The signed distance field  $F_s^p$  has eight layers with the softplus  
8 activation and has a skip connection to the middle layer. The input of  $F_s^p$  is the positional encoding  
9 of point position  $\gamma_{\mathbf{x}}(\mathbf{x}) \in R^{39}$  and the outputs are signed distance  $s(\mathbf{x}) \in R$  and geometry feature  
10  $\mathbf{z}(\mathbf{x}) \in R^{256}$ .

11 The color field  $F_c^p$  has four layers with the ReLU activation and has a skip connection to the middle  
12 layer. The inputs of  $F_c^p$  are the positional encoding of point position  $\gamma_{\mathbf{x}}(\mathbf{x}) \in R^{39}$ , the positional  
13 encoding of view direction  $\gamma_{\mathbf{d}}(\mathbf{d}) \in R^{27}$ , normal of point position  $\mathbf{n}(\mathbf{x}) \in R^3$ , and latent code  
14  $\ell^p \in R^{128}$ . The output of  $F_c^p$  is the color  $\mathbf{c}(\mathbf{x}) \in R^3$ .

15 The non-rigid displacement field  $T_{nr}^p$  has eight layers with the ReLU activation and has a skip  
16 connection to the middle layer. The inputs of  $T_{nr}^p$  are the positional encoding of point position  
17  $\gamma_{\mathbf{x}}(\mathbf{x}) \in R^{39}$  and latent code  $\phi^p \in R^{128}$  and the output is the displacement  $\Delta\mathbf{x} \in R^3$ .

18 The  $\lambda_1$  in Equation (10) is set to 0.1. The  $\lambda_2^p$ s in Equation (10) are set to 0.01 for the body and face  
19 and 0.001 for the hands.

20 **Training details.** The Adam optimizer [1] is adopted for training and the learning rate is set as  
21  $5e^{-4}$  which decays exponentially to  $5e^{-5}$  during the learning procedure. The training is done on  
22 a single Nvidia 2080-Ti GPU. Each part model is trained for 100k iterations, which takes approx-  
23 imately 6 hours. In addition, the appearance latent code optimization adopts the same optimizer  
24 and the learning rate as the training but conducts approximately 15k iterations for each part model  
25 except the body.

26 **Inverse LBS.** Given a sample point  $\mathbf{x}$  in the observation space and the human pose  $\mathbf{p}$ , the inverse  
27 linear blend skinning [2, 7, 6] can be written as follows:

$$T_{lbs}(\mathbf{x}, \mathbf{p}) = \left( \sum_{k=1}^K w^k(\bar{\mathbf{x}}) \mathbf{B}(\mathbf{p})^k \right)^{-1} \bar{\mathbf{x}}, \quad (1)$$

Table 1: Quantitative results of 3D reconstruction of each part for each subject on *SynTotalHuman* dataset.

|                | m1   |      | m2   |      | f1   |      | f2   |      |
|----------------|------|------|------|------|------|------|------|------|
| Head           | P2S↓ | CD↓  | P2S↓ | CD↓  | P2S↓ | CD↓  | P2S↓ | CD↓  |
| NeuralBody [5] | 1.64 | 1.38 | 1.64 | 1.41 | 1.68 | 1.81 | 1.23 | 1.26 |
| AniNeRF [3]    | 1.55 | 1.34 | 1.73 | 1.54 | 2.24 | 2.08 | 1.68 | 1.82 |
| AniSDF [4]     | 0.45 | 0.59 | 1.05 | 0.99 | 0.90 | 1.11 | 0.64 | 0.95 |
| Ours           | 0.40 | 0.53 | 0.67 | 0.74 | 0.69 | 1.04 | 0.61 | 0.95 |
| Left hand      | P2S↓ | CD↓  | P2S↓ | CD↓  | P2S↓ | CD↓  | P2S↓ | CD↓  |
| NeuralBody [5] | 1.54 | 1.37 | 1.00 | 0.93 | 1.97 | 1.80 | 1.38 | 1.27 |
| AniNeRF [3]    | 1.03 | 0.89 | 1.06 | 0.96 | 1.37 | 1.17 | 1.00 | 0.93 |
| AniSDF [4]     | 0.52 | 0.52 | 0.71 | 0.74 | 1.11 | 1.03 | 0.90 | 0.90 |
| Ours           | 0.44 | 0.49 | 0.37 | 0.37 | 0.58 | 0.52 | 0.87 | 0.88 |
| Right hand     | P2S↓ | CD↓  | P2S↓ | CD↓  | P2S↓ | CD↓  | P2S↓ | CD↓  |
| NeuralBody [5] | 1.25 | 1.10 | 1.02 | 1.02 | 1.26 | 1.14 | 0.92 | 0.88 |
| AniNeRF [3]    | 1.16 | 1.01 | 1.17 | 1.06 | 1.19 | 1.05 | 0.98 | 0.92 |
| AniSDF [4]     | 0.47 | 0.48 | 0.66 | 0.64 | 1.05 | 0.90 | 0.88 | 0.77 |
| Ours           | 0.33 | 0.34 | 0.33 | 0.35 | 0.79 | 0.67 | 0.67 | 0.56 |
| Total          | P2S↓ | CD↓  | P2S↓ | CD↓  | P2S↓ | CD↓  | P2S↓ | CD↓  |
| NeuralBody [5] | 2.13 | 1.86 | 2.29 | 2.15 | 2.12 | 1.97 | 2.10 | 1.93 |
| AniNeRF [3]    | 2.49 | 2.15 | 2.28 | 2.07 | 2.72 | 2.29 | 2.72 | 2.35 |
| AniSDF [4]     | 2.04 | 2.14 | 2.12 | 2.18 | 1.74 | 1.81 | 1.69 | 1.75 |
| Ours           | 1.98 | 2.07 | 1.97 | 2.03 | 1.73 | 1.76 | 1.68 | 1.71 |

Table 2: Quantitative results of image synthesis under novel human pose of each part for each subject on *SynTotalHuman* dataset.

|               | m1    |       |        | m2    |       |        | f1    |       |        | f2    |       |        |
|---------------|-------|-------|--------|-------|-------|--------|-------|-------|--------|-------|-------|--------|
| Head          | PSNR↑ | SSIM↑ | LPIPS↓ |
| NeuralBody[5] | 19.20 | 0.918 | 0.174  | 20.44 | 0.915 | 0.188  | 19.19 | 0.922 | 0.175  | 16.92 | 0.901 | 0.198  |
| AniNeRF[3]    | 19.74 | 0.926 | 0.167  | 21.07 | 0.930 | 0.173  | 21.53 | 0.932 | 0.130  | 21.33 | 0.925 | 0.141  |
| AniSDF[4]     | 22.50 | 0.939 | 0.093  | 20.98 | 0.925 | 0.113  | 22.52 | 0.940 | 0.103  | 21.62 | 0.933 | 0.106  |
| Ours          | 22.64 | 0.944 | 0.071  | 21.32 | 0.926 | 0.088  | 21.32 | 0.930 | 0.102  | 23.66 | 0.939 | 0.076  |
| Left hand     | PSNR↑ | SSIM↑ | LPIPS↓ |
| NeuralBody[5] | 18.75 | 0.889 | 0.245  | 18.92 | 0.885 | 0.235  | 17.71 | 0.895 | 0.243  | 18.26 | 0.890 | 0.228  |
| AniNeRF[3]    | 19.23 | 0.902 | 0.177  | 21.27 | 0.904 | 0.193  | 22.16 | 0.923 | 0.148  | 20.39 | 0.911 | 0.144  |
| AniSDF[4]     | 22.05 | 0.935 | 0.105  | 21.99 | 0.934 | 0.107  | 19.93 | 0.922 | 0.122  | 21.64 | 0.934 | 0.080  |
| Ours          | 21.78 | 0.933 | 0.096  | 23.11 | 0.942 | 0.065  | 21.25 | 0.938 | 0.083  | 22.45 | 0.945 | 0.062  |
| Right hand    | PSNR↑ | SSIM↑ | LPIPS↓ |
| NeuralBody[5] | 19.23 | 0.894 | 0.243  | 19.08 | 0.894 | 0.243  | 18.01 | 0.901 | 0.252  | 18.12 | 0.893 | 0.233  |
| AniNeRF[3]    | 19.48 | 0.905 | 0.200  | 20.58 | 0.902 | 0.220  | 21.69 | 0.910 | 0.178  | 19.99 | 0.897 | 0.172  |
| AniSDF[4]     | 21.86 | 0.930 | 0.117  | 21.52 | 0.927 | 0.121  | 19.62 | 0.920 | 0.154  | 21.86 | 0.938 | 0.084  |
| Ours          | 22.80 | 0.936 | 0.090  | 23.38 | 0.941 | 0.073  | 22.61 | 0.949 | 0.070  | 22.56 | 0.945 | 0.066  |
| Total         | PSNR↑ | SSIM↑ | LPIPS↓ |
| NeuralBody[5] | 19.19 | 0.831 | 0.231  | 20.27 | 0.854 | 0.248  | 20.22 | 0.869 | 0.241  | 20.22 | 0.866 | 0.237  |
| AniNeRF [3]   | 21.46 | 0.881 | 0.199  | 24.31 | 0.894 | 0.197  | 24.91 | 0.884 | 0.173  | 24.14 | 0.896 | 0.171  |
| AniSDF[4]     | 25.54 | 0.907 | 0.144  | 26.51 | 0.916 | 0.136  | 23.34 | 0.914 | 0.129  | 26.87 | 0.928 | 0.107  |
| Ours          | 26.78 | 0.919 | 0.127  | 26.94 | 0.919 | 0.123  | 23.36 | 0.915 | 0.112  | 27.52 | 0.932 | 0.095  |

28 where  $\bar{\mathbf{x}}$  denotes the homogeneous coordinate of  $\mathbf{x}$  and  $\mathbf{B}(\mathbf{p})^k \in SE(3)$  denotes the transformation  
 29 matrix of bone  $k$ .  $w^k(\bar{\mathbf{x}})$  is the blend weight of bone  $k$ , which is acquired by retrieving the blend  
 30 weight of the closest vertex on the template mesh.  $K$  is the number of bones.

## 31 2 Detailed quantitative results

32 In this section, we present the detailed quantitative results of 3D reconstruction and image synthesis  
 33 on *SynTotalHuman* dataset in Table 1 and 2.

34 **References**

- 35 [1] Diederik P Kingma and Jimmy Ba. Adam: A method for stochastic optimization. *ICLR*, 2015.
- 36 [2] Matthew Loper, Naureen Mahmood, Javier Romero, Gerard Pons-Moll, and Michael J Black. Smpl: A  
37 skinned multi-person linear model. *ACM transactions on graphics (TOG)*, 34(6):1–16, 2015.
- 38 [3] Sida Peng, Junting Dong, Qianqian Wang, Shangzhan Zhang, Qing Shuai, Xiaowei Zhou, and Hujun Bao.  
39 Animatable neural radiance fields for modeling dynamic human bodies. In *ICCV*, pages 14314–14323,  
40 2021.
- 41 [4] Sida Peng, Shangzhan Zhang, Zhen Xu, Chen Geng, Boyi Jiang, Hujun Bao, and Xiaowei Zhou. Animat-  
42 able neural implicit surfaces for creating avatars from videos. *arXiv preprint arXiv:2203.08133*, 2022.
- 43 [5] Sida Peng, Yuanqing Zhang, Yinghao Xu, Qianqian Wang, Qing Shuai, Hujun Bao, and Xiaowei Zhou.  
44 Neural body: Implicit neural representations with structured latent codes for novel view synthesis of dy-  
45 namic humans. In *CVPR*, pages 9054–9063, 2021.
- 46 [6] Shaofei Wang, Marko Mihajlovic, Qianli Ma, Andreas Geiger, and Siyu Tang. Metaavatar: Learning  
47 animatable clothed human models from few depth images. *Advances in Neural Information Processing*  
48 *Systems*, 34, 2021.
- 49 [7] Hongyi Xu, Eduard Gabriel Bazavan, Andrei Zanfir, William T Freeman, Rahul Sukthankar, and Cristian  
50 Sminchisescu. Ghum & ghuml: Generative 3d human shape and articulated pose models. In *Proceedings*  
51 *of the IEEE/CVF Conference on Computer Vision and Pattern Recognition*, pages 6184–6193, 2020.
